# Supplementary material for: Design of the 18-year follow-up of the Danish COPSAC2000 birth cohort
Source: PubMed Central journal article supplement (PMC11367328; doi:10.1136/bmjpo-2024-002634), 2024-08-30
Supplement: bmjpo-8-1-s001.pdf [file bmjpo-8-1-s001.pdf]

1 **SUPPLEMENTARY**  
 2  
 3 **TABLE S1**  
 4

| <b>Table S1: Blood samples</b>          |                     |                                                   |
|-----------------------------------------|---------------------|---------------------------------------------------|
| <b>Lever</b>                            | <b>Median (IQR)</b> | <b>% placed outside normal reference interval</b> |
| ALAT<br>F:10–45 U/L<br>M:10-70 U/L      | 25 (10.0)           | F: Low: 0.6; High: 4.4<br>M: Low: 0.6; High: 4.6  |
| ASAT<br>F: 15-35 U/L<br>M: 15-45 U/L    | 28 (9.0)            | F: Low: 1.9; High: 10.8<br>M: High: 7.8           |
| Amylase<br>10-65 U/L                    | 78.5 (17.5)         | Low: 2.35<br>High: 11.1                           |
| Alkaline phosphatase<br>35-105 U/L      | 74 (31.0)           | Low: 10.4<br>High: 6.5                            |
| Bilirubin<br>5-25 $\mu\text{mol/L}$ / L | 10 (6.0)            | Low: 1.17<br>High: 19.1                           |
| GGT<br>F: 10-45 U/L<br>M: 10-80 U/L     | 17 (10.0)           | F: Low: 3.2; High: 1.9<br>M: Low: 0.7; High 0.7   |
| LDH<br>105 - 205 U/L                    | 146 (28.2)          | Low: 19.9<br>High: 3.2                            |
| Haptoglobin<br>0.35 – 1.85 g/L          | 0.97 (0.6)          | Low: 4.2<br>High: 5.8                             |
|                                         | <b>Mean (SD)</b>    | <b>% placed outside normal reference interval</b> |
| Albumin<br>36-48 g/L                    | 43.3 (2.9)          | Low: 10.6<br>High: 13.3                           |
| Antitrypsin<br>0.97-1.68 g/L            | 1.35 (0.3)          | Low: 5.11<br>High: 13.7                           |

| <b>Coagulation</b>                                          | <b>Median (IQR)</b> | <b>% placed outside normal reference interval</b>  |
|-------------------------------------------------------------|---------------------|----------------------------------------------------|
| Antithrombin<br>0.80-1.20 × 10 <sup>3</sup> int.enh. / L    | 1.0 (0.1)           | Low: 2.1<br>High: 3.3                              |
| INR<br><1,2                                                 | 1.1 (0.1)           | High: 0.6                                          |
| Homocystein<br>< 10.0 µmol/L                                | 10.1 (4.7)          | High: 2.4                                          |
|                                                             | <b>Mean (SD)</b>    | <b>% placed outside normal reference interval</b>  |
| APTT<br>20-29 s                                             | 30.5 (5.2)          | Low: 5.9<br>High: 17.8                             |
| <b>Nephrology</b>                                           | <b>Median (IQR)</b> | <b>% placed outside normal reference interval</b>  |
| Creatinine kinase, CK<br>F: 50-150 U/L<br>M: 50-270 U/L     | 93 (82.0)           | F: Low: 18.4; High: 12.0<br>M: Low: 0.6; High 16.1 |
| Creatinine<br>F: 45-90 µmol/L<br>M: 60-105 µmol/L           | 68 (15.0)           | F: High: 0.6<br>M: Low: 6.5; High 0.6              |
| Carbamide<br>F: 2.6-6.4 mmol/L<br>M: 3.2 – 8.1 mmol/L       | 4.5 (1.7)           | F: Low: 3.2; High: 1.3<br>M: Low: 5.8; High: 0.6   |
| Phosphate<br>F: 0.76 – 1.41 mmol/L<br>M: 0.71 – 1.53 mmol/L | 1.19 (0.2)          | F: High: 6.3<br>M: High: 3.9                       |
| PSA<br>< 3,0 µg/L                                           | 0.4 (0.4)           | ._***                                              |
|                                                             | <b>Mean (SD)</b>    | <b>% placed outside normal reference interval</b>  |
| Kalium<br>3.5 – 4.6 mmol/L                                  | 141 (1.7)           | Low: 10.9<br>High: 0.3                             |
| Calcium-ion frit<br>1.18-1.32 mmol/L                        | 1.24 (0.0)          | Low: 1.0<br>High: 0.3                              |

|                                                                                     |                     |                                                   |
|-------------------------------------------------------------------------------------|---------------------|---------------------------------------------------|
| Sodium<br>137 - 145 mmol/L                                                          | 1.24 (0.0)          | Low: 4.4<br>High: 20.9                            |
| Urate<br>F: 0.16-0.35 mmol/L<br>M: 0.23-0.48 mmol/L                                 | 0.311 (0.1)         | F: Low: 2.5; High: 4.4<br>M: Low: 0.6; High: 0.6  |
| <b>Coronary enzymes</b>                                                             | <b>Median (IQR)</b> | <b>% placed outside normal reference interval</b> |
| Troponin ITNI<br>< 24 ng/L                                                          | 7 (11.5)            | High: 1.5                                         |
| ProBNP<br>No reference level                                                        | 56.5 (35.8)         | -                                                 |
| <b>Vitamins</b>                                                                     | <b>Median (IQR)</b> | <b>% placed outside normal reference interval</b> |
| B12 vitamin<br>200 - 600 pmol/L                                                     | 351 (162.0)         | Low: 5.8<br>High: 5.1                             |
| Folate<br>>8.6 nmol/L                                                               | 11 (7.5)            | Low: 29.7                                         |
|                                                                                     | <b>Mean (SD)</b>    | <b>% placed outside normal reference interval</b> |
| D-vitamin, P-25-OH-Vitamin D(D3+D2)<br>50 - 160 nmol/L                              | 64 (42.0)           | Low: 31.4<br>High: 0.3                            |
| Jern<br>9 - 34 µmol/L                                                               | 16.6 (6.8)          | Low: 8.6<br>High: 1.2                             |
| Magnesium<br>0.70 – 1.10 mmol/L                                                     | 0.822 (0.1)         | Low: 1.6                                          |
| <b>Haematology</b>                                                                  | <b>Median (IQR)</b> | <b>% placed outside normal reference interval</b> |
| Platelets<br>F: 165 - 400 x 10 <sup>9</sup> /L<br>M: 145 - 350 x 10 <sup>9</sup> /L | 250 (68.0)          | F: Low: 1.2; High: 1.9<br>M: High: 4.6            |
| Ferritin<br>13-152 µg/L                                                             | 38 (41.0)           | Low: 11.9<br>High: 2.3                            |
| Erythrocyte vol. Spred.<br>No reference levels.                                     | 13 (0.0)            | -                                                 |

|                                                                                           |                  |                                                   |
|-------------------------------------------------------------------------------------------|------------------|---------------------------------------------------|
| Reticulocytes<br>F: 39-139 x 10 <sup>9</sup> /L<br>M: 39-139 x 110 <sup>9</sup> /L        | 58 (22.0)        | F: Low: 12.4<br>M: Low: 7.1; High 0.6             |
| Eosinophilic<br>>0.5 x 10 <sup>9</sup> /L                                                 | 0.2 (0.2)        | High: 5.6                                         |
| Basophilic<br>>0.2 x 10 <sup>9</sup> /L                                                   | 0 (0.1)          | High: 33.8                                        |
| Atypical cells<br>No reference levels                                                     | 0.1 (0.0)        | -                                                 |
| Monocytes<br>0.2-0.8 x 10 <sup>9</sup> /L                                                 | 0.4 (0.2)        | Low: 0.3<br>High: 1.2                             |
| Neutrophiles<br>1.6-5.9 x 10 <sup>9</sup> /L                                              | 2.99 (1.5)       | Low: 1.5<br>High: 25.4                            |
| Transferrin saturation<br>0.2-0.5                                                         | 0.24 (0.1)       | Low: 33.1<br>High: 3.2                            |
| Transferritin, massek.<br>F: 2.12-3.91 g/L<br>M: 2.12-3.3 g/L                             | 2.66 (0.6)       | F: Low: 3.2; High: 3.2<br>M: Low: 7.1; High: 3.9  |
| CRP<br>< 9 mg/L                                                                           | 0.74 (1.7)       | High: 3.7                                         |
|                                                                                           | <b>Mean (SD)</b> | <b>% placed outside normal reference interval</b> |
| Haemoglobin<br>F: 7.3 – 9.5 mmol/L<br>M: 8.3 – 10.5 mmol/L                                | 8.62 (0.8)       | F: Low: 5.7<br>M: Low: 3.3                        |
| MCV<br>82-98 fL                                                                           | 85.9 (3.6)       | Low: 10.9                                         |
| Erythrocytter<br>F: 3.94-5.16 x 10 <sup>12</sup> /L<br>M: 4.25-5.71 x 10 <sup>12</sup> /L | 4.73 (0.4)       | F: Low: 2.5<br>M: Low: 1.3; High: 0.6             |
| Erythrocytter vol.fr<br>F: 0.35-0.46<br>M: 0.4-0.5                                        | 0.41 (0.1)       | F: Low: 3.8<br>M: Low: 7.8                        |
| Lymphocytes<br>1.0-3.5 x 10 <sup>9</sup> /L                                               | 1.91 (0.5)       | Low: 0.9<br>High: 0.3                             |

|                                                                                     |                  |                                                   |
|-------------------------------------------------------------------------------------|------------------|---------------------------------------------------|
| MCH<br>1.7-2.1 fmol                                                                 | 1.83 (0.1)       | Low: 2.9<br>High: 0.3                             |
| MCHC<br>19.7-22.2 mmol /L                                                           | 21.3 (0.6)       | Low: 0.3<br>High: 5.1                             |
| Leucocytes<br>3.5-8.8 x 10 <sup>9</sup> /L                                          | 5.8 (2.1)        | Low: 1.0<br>High: 6.1                             |
| <b>Sex hormones</b>                                                                 | <b>Mean (SD)</b> | <b>% placed outside normal reference interval</b> |
| Prolactin<br>F: 25-600 x 10 <sup>-3</sup> IU/L<br>M: 40-400 x 10 <sup>-3</sup> IU/L | 196 (91.5)       | F: High: 1.9<br>M: High: 2.0                      |
| Estradiol<br>F: Not normal references for this age group<br>M: > 0.3 nmol/L         | 0.15 (0.1)       | _***                                              |
| FSH<br>F: Not normal references for this age group<br>M: 1.4-7.5 IU/L               | 4.05 (3.5)       | F: _***<br>M: Low: 3.3; High: 6.6                 |
| Progesteron<br>F: Not normal references for this age group<br>M: 0.7-4.3 nmol/L     | 1.8 (1.1)        | _***                                              |
| Lutropin, LH<br>F: 1-53 IU/L<br>M: 1-7.5 IU/L                                       | 3.9 (2.6)        | F: High: 0.6<br>M: _***                           |
| HCG**<br>< 3 IU/L                                                                   | 1 (2.0)          | _***                                              |
| <b>Metabolism</b>                                                                   | <b>Mean (SD)</b> | <b>% placed outside normal reference interval</b> |
| Proinsulin<br>336-4113 pmol/L                                                       | 427 (222.0)      | Low: 27.4                                         |
| Insulin<br>20.8 – 173.6 pmol/L                                                      | 71 (56.0)        | Low: 0.6<br>High: 7.4                             |

|                                                     |                  |                                                   |
|-----------------------------------------------------|------------------|---------------------------------------------------|
| Hemoglobin A1c, IFCC<br>< 48 mmol/mol               | 5.4 (0.6)        | High: 0.3                                         |
| HbA1C, middle glucose<br>< 7.7 mmol/L               | 32 (3.0)         | High: 0.3                                         |
| Glucose<br>4.2-6.3 mmol/L                           | 5.1 (0.5)        | High: 1.6                                         |
| Cholesterol, VLDL<br>> 0.9 mmol/L                   | 0.4 (0.2)        | High: 2.6                                         |
| Cholesterol, HDL<br>< 1 mmol/L                      | 1.18 (0.3)       | ***-                                              |
| Cholesterol, LDL<br>>3 mmol/L                       | 2 (0.7)          | High: 7.0                                         |
| Cholesterol, total<br>> 5 mmol/L                    | 3.7 (0.8)        | High: 2.9                                         |
| Triglyceride<br>> 2 mmol/L                          | 0.88 (0.5)       | High: 3.2                                         |
| PTH, parathyrin<br>2-8.5 pmol/L                     | 4.84 (2.5)       | Low: 1.0<br>High: 5.1                             |
| TSH, Thyrotropin<br>0.4-4.8 x 10 <sup>-3</sup> IU/L | 1.82 (1.2)       | High: 3.6                                         |
| <b>Immunology and antibodies</b>                    | <b>Mean (SD)</b> | <b>% placed outside normal reference interval</b> |
| IgA<br>F: 0.65-3.06 g/L<br>M: 0.63-3.21 g/L         | 1.49 (1.0)       | F: Low: 3.1; High: 2.5<br>M: Low: 4.5; High: 2.6  |
| IgG<br>F: 7.4-15.6 g/L<br>M: 7.1-15.3 g/L           | 10 (2.6)         | F: Low: 3.8; High: 0.6<br>M: Low: 5.8; High: 2.6  |
| IgM<br>F: 0.66-2.61 g/L<br>M: 0.5-1.94 g/L          | 1 (0.6)          | F: Low: 8.2; High: 1.3<br>M: Low: 8.4; High: 2.3  |

- 5 **TS1 1: Blood samples:** Presentation of blood samples with mean values and number in % of values  
6 placed outside normal reference interval.  
7 :  
8 M=Male, F=Female  
9 \*Samples not collected, haemolysed, or too little material to run the analysis.  
10 \*\*24 probands with positive values.  
11 \*\*\* All values are placed in the normal interval.

12 **TABLE S2**  
13

| <b>Table S2: Faeces</b>                                                                                                       | <b>Median (IQR)</b> | <b>Negative (%)</b> | <b>% placed outside normal reference interval</b> |
|-------------------------------------------------------------------------------------------------------------------------------|---------------------|---------------------|---------------------------------------------------|
| <b>F-Calprotectin</b><br><50: IBD** implausible<br>50 – 200: Elevated, repetition recommended<br>>200: Elevated, IBD** likely | 34 (48.0)           | 109 (27)            | >200: 2.1<br>50-200: 9.6<br><50: 22.0             |

14 **Table S2:**  
 15 \*Samples not collected or too little material to run the analysis.  
 16 \*\*Inflammatory bowel disease  
 17 or too little material to run the analysis.

18  
19  
20 **TABLE S3**  
21

| <b>Table S3: Immunology and antibodies</b>                   | <b>Median (IQR)</b> |
|--------------------------------------------------------------|---------------------|
| Smith's Antibody                                             | 2.0 (2.0)           |
| Sedimentations-reaction, SR                                  | 7.0 (3.3)           |
| Cykl.citrul.peptid antibody, CCP                             | 1.0 (1.0)           |
| Sjögrens syndrome A IgG                                      | 32.0 (0.0)          |
| Sjögrens syndrome B IgG                                      | 1.0 (0.5)           |
| Transglutaminase IgA                                         | 2.0 (7.5)           |
| Transglutaminase IgG                                         | 1.0 (1.0)           |
| rRNA 2'O-methyltransferase fibrillar-in-anti (IgG)           | 1.3 (1.0)           |
| Centromer B antibody IgG – CBAIgG                            | 3.2 (1.0)           |
| P-Histidin--tRNA-ligase(Jo 1) -antistof(IgG)                 | -                   |
| P-DNA (dobbel-stranded) -antibody(IgG)                       | 4.9 (4.5)           |
| P-Chromodomain-helicase-DNA-binding protein 4-antibody (IgG) | 7.2 (9.0)           |
| P-proliferating nucleus-antibody (IgG)                       | 2.0 (0.0)           |
| P-ACE (Peptidyl dipeptidase A)                               | 51.2 (22.0)         |
| P-Exosome component 10-antibody (IgG)                        | 1.3 (0.3)           |
| P-Connective tissue related disease antibody                 | 0.3 (0.2)           |
| Scleroderma IgG                                              | 1.7 (1.0)           |

|                                                               |            |
|---------------------------------------------------------------|------------|
| P-Ribonucleo protein U1 (70 kDA+A+C) - antibody (IgG)         | 2.7 (1.0)  |
| P-DNA-directed RNA polymerase III subunit RPC1-antibody (IgG) | 3.0 (2.0)  |
| P-Acidic ribosomal protein antibody (IgG)                     | 1.4 (0.3)  |
| Rheuma-factor IgM                                             | 20.0 (2.0) |

22  
23
